# Supplementary material for: An amphiphilic water-soluble biphen[3]arene with a tunable lower critical solution temperature behavior
Source: Royal Society of Chemistry journal article supplement (doi:10.1039/d2nj03918d), 2022-01-01
Supplement: d2nj03918d1.pdf [file d2nj03918d1.pdf]

## An amphiphilic water-soluble biphen[3]arene with tunable lower critical solution temperature behavior

Wenjie Zhang, Wenzhi Yang, Jingyu Chen, Yuhao Wang, Miaomiao Yan and Jiong Zhou\*

*Department of Chemistry, College of Sciences, Northeastern University, Shenyang 110819, P. R. China;*

*Email address: [zhoujiong@mail.neu.edu.cn](mailto:zhoujiong@mail.neu.edu.cn)*

### Electronic Supplementary Information

1.  $^1\text{H}$  NMR,  $^{13}\text{C}$  NMR and mass spectra of amphiphilic water-soluble biphen[3]arene **H** S2
2. UV-vis absorption spectrum of **H** S4
3. Transmission electron microscopy (TEM) studies of **H** below and above its LCST S4
4. Dynamic light scattering (DLS) results of **H** S5
5.  $^1\text{H}$  NMR study of **H** in the presence and absence of  $\text{K}^+$  S6

1.  $^1\text{H}$  NMR,  $^{13}\text{C}$  NMR and mass spectra of amphiphilic water-soluble biphen[3]arene **H**

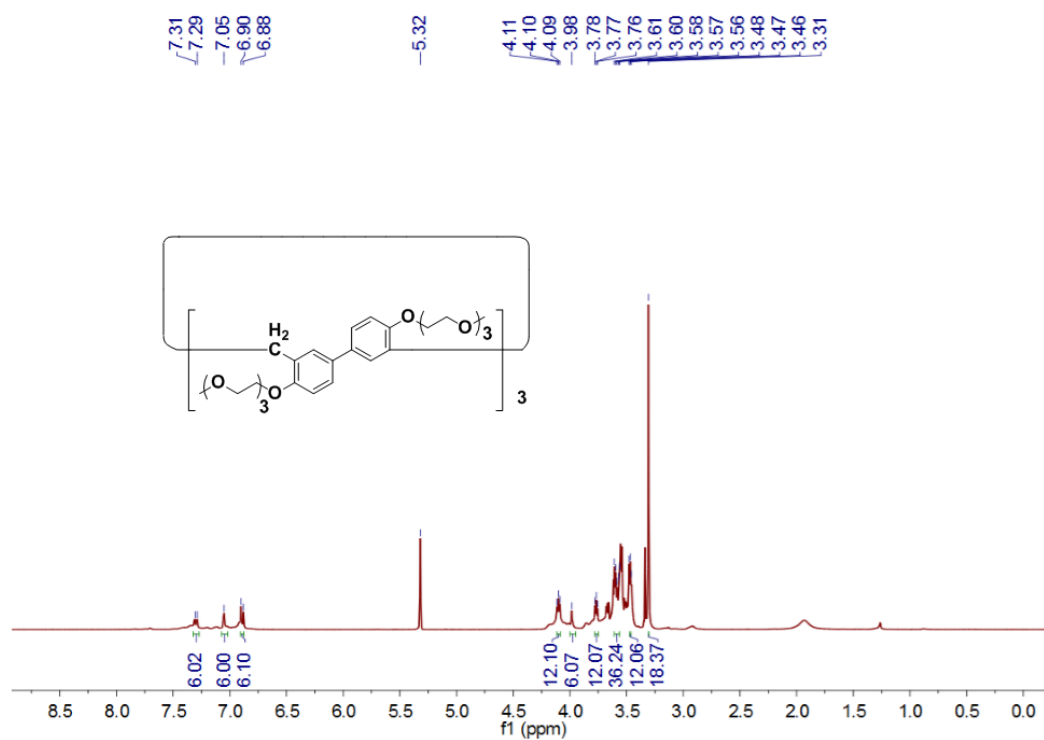

**Figure S1.**  $^1\text{H}$  NMR spectrum (400 MHz, dichloromethane- $d_2$ , 293 K) of **H**.

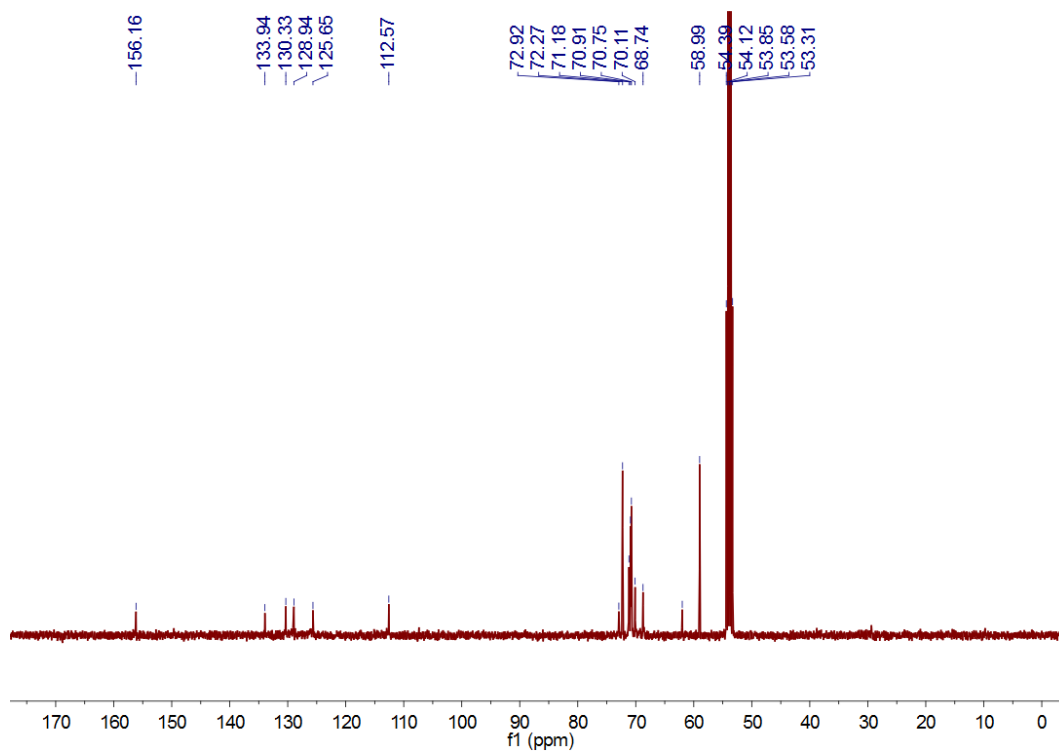

**Figure S2.**  $^{13}\text{C}$  NMR spectrum (100 MHz, dichloromethane- $d_2$ , 293 K) of **H**.

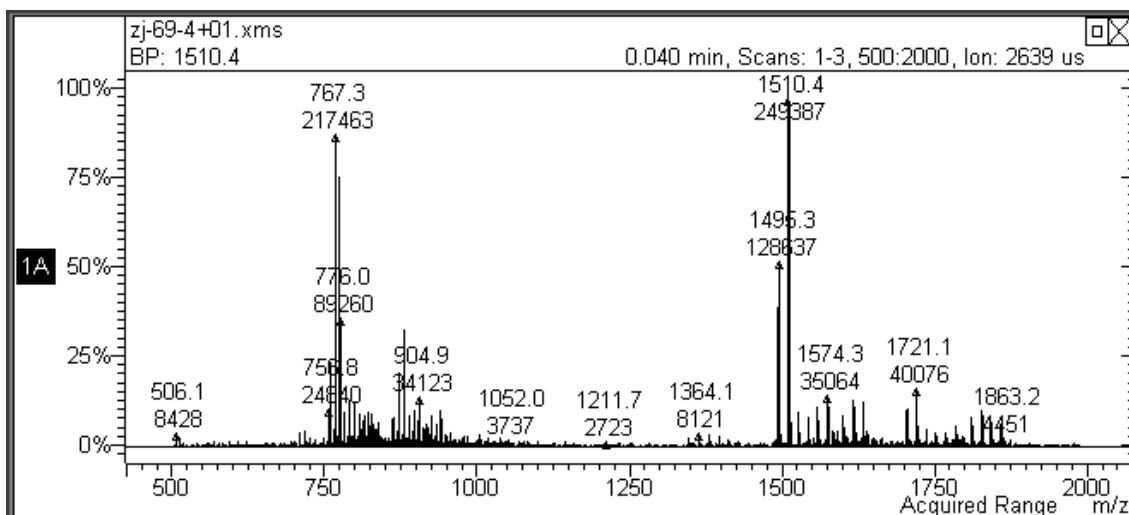

**Figure S3.** Low-resolution electrospray ionization mass spectrum (LRESI-MS) of **H**. Assignment of the main peak:  $m/z$  767.3  $[M + Na + K]^{2+}$ , 1510.4  $[M + K]^+$ .

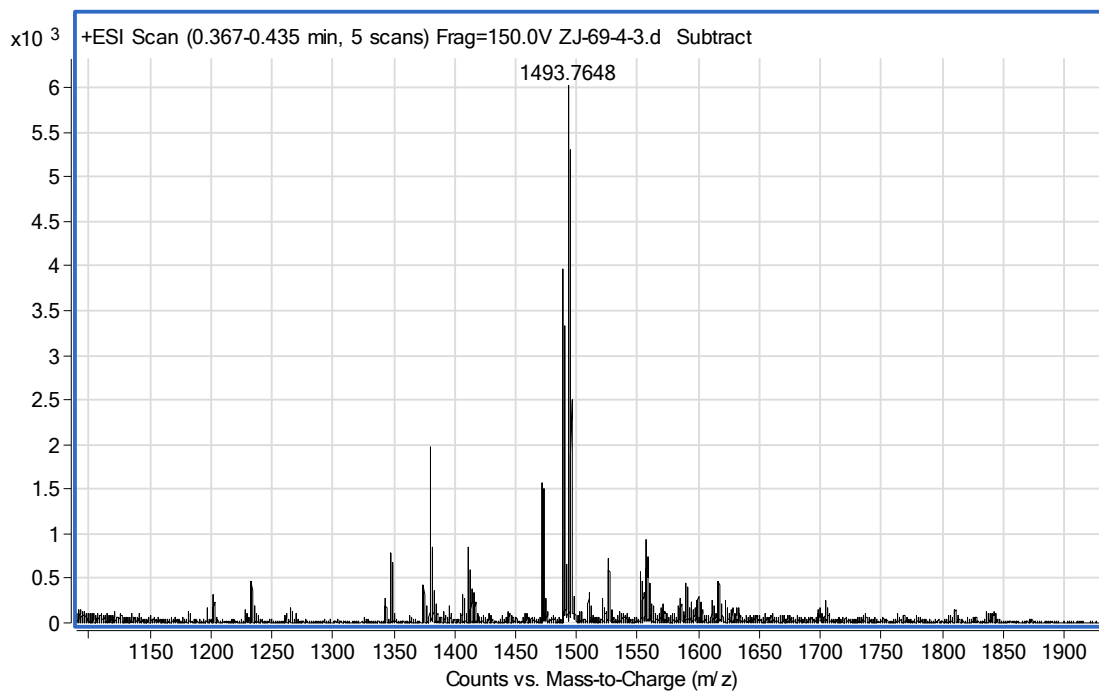

**Figure S4.** High-resolution electrospray ionization mass spectrum (HRESI-MS) of **H**. Assignment of the main peak:  $m/z$  1493.7648  $[M + Na]^+$ .

2. UV-vis absorption spectrum of **H**

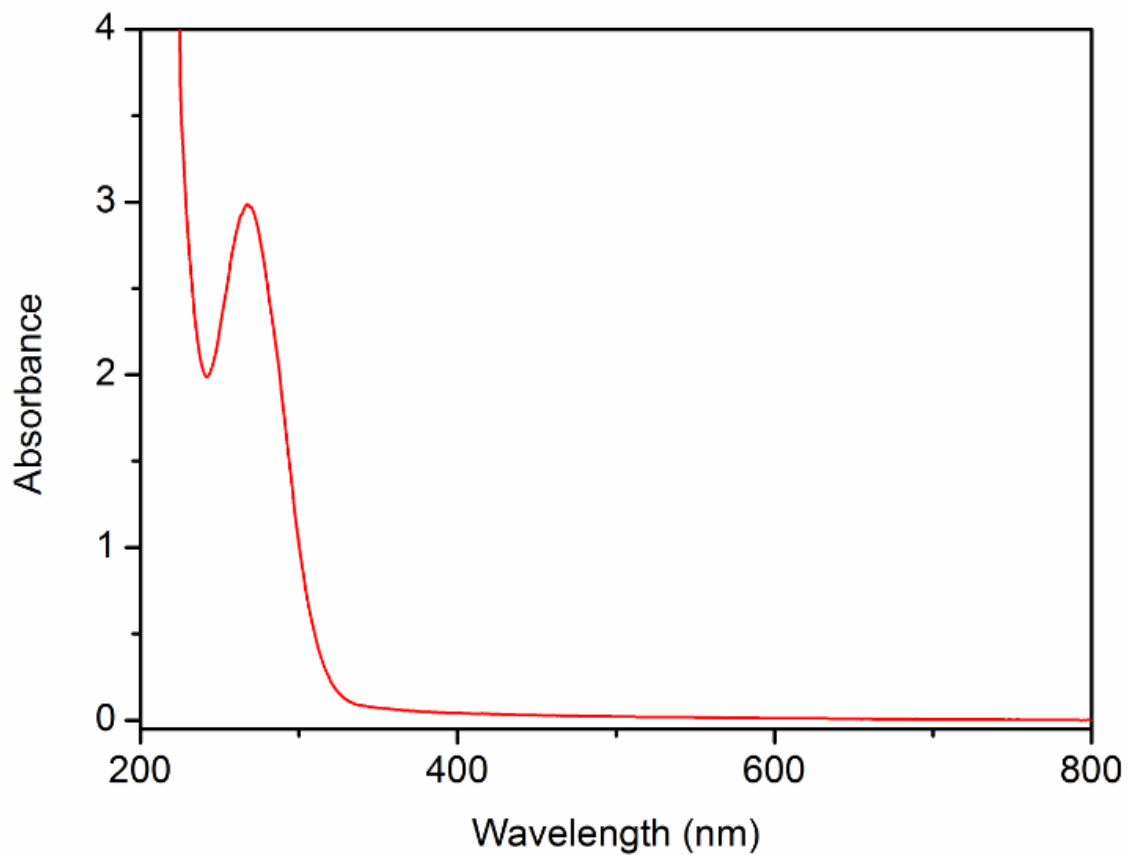

**Figure S5.** UV-vis absorption spectrum of **H** (0.500 mM) in aqueous solution.

3. Transmission electron microscopy (TEM) studies of **H** below and above its LCST

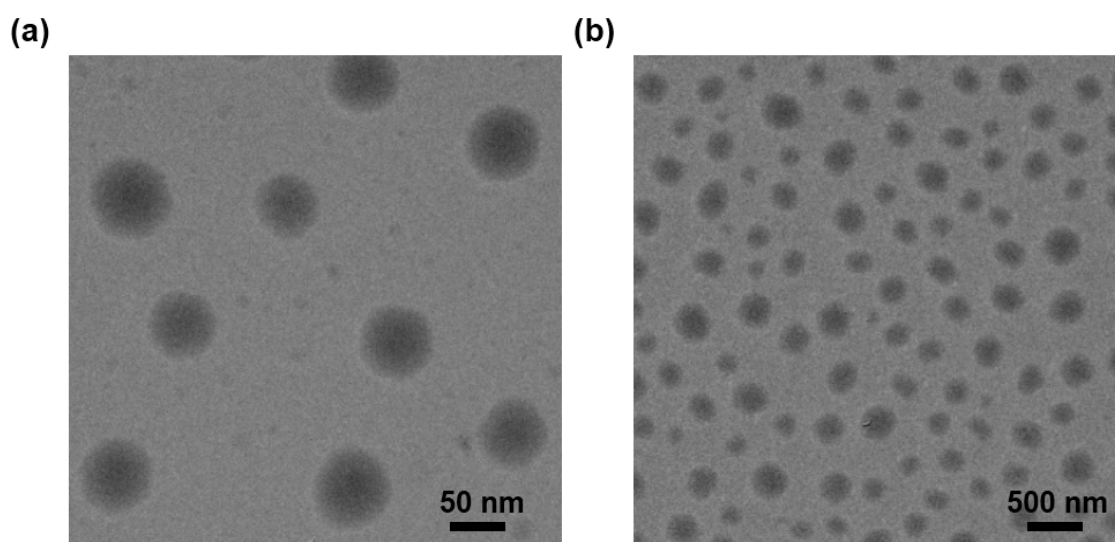

**Figure S6.** TEM images of aqueous solutions: (a) amphiphilic macrocycle **H** dried at 10 °C; (b) amphiphilic macrocycle **H** dried at 30 °C. [**H**] = 2.00 mM.

#### 4. Dynamic light scattering (DLS) results of **H**

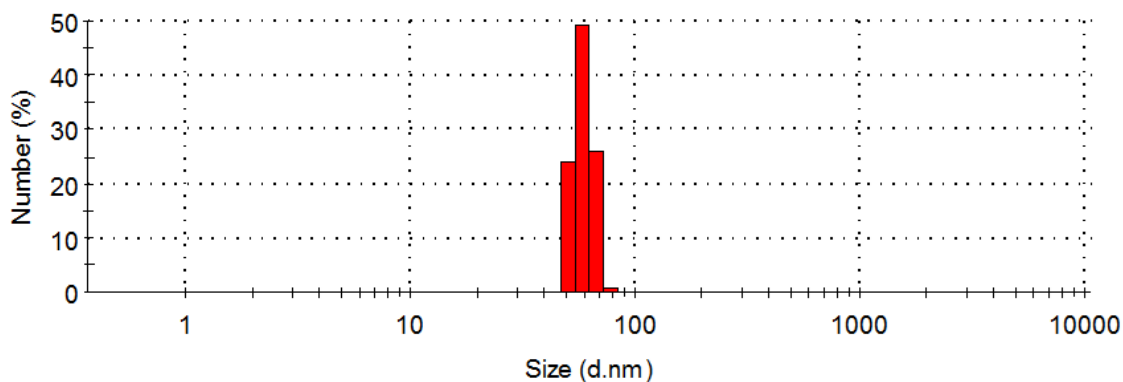

**Figure S7.** DLS result of **H** (2.00 mM) in aqueous solution at 10 °C. The average hydrodynamic diameter of **H** was ~59 nm, indicating that **H** forms assembled structure.

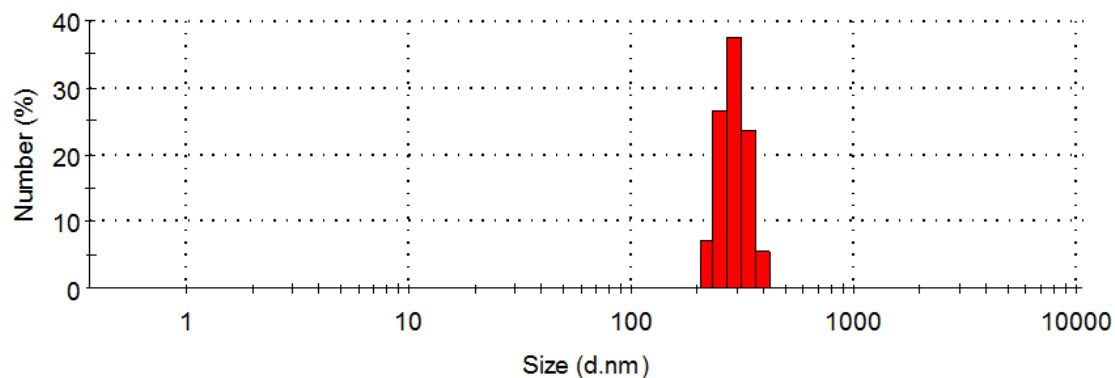

**Figure S8.** DLS result of **H** (2.00 mM) in aqueous solution at 30 °C. The average hydrodynamic diameter of **H** increased to ~296 nm above  $T_{\text{cloud}}$ , indicating that **H** forms large aggregate structure.

5.  $^1\text{H}$  NMR study of **H** in the presence and absence of  $\text{K}^+$

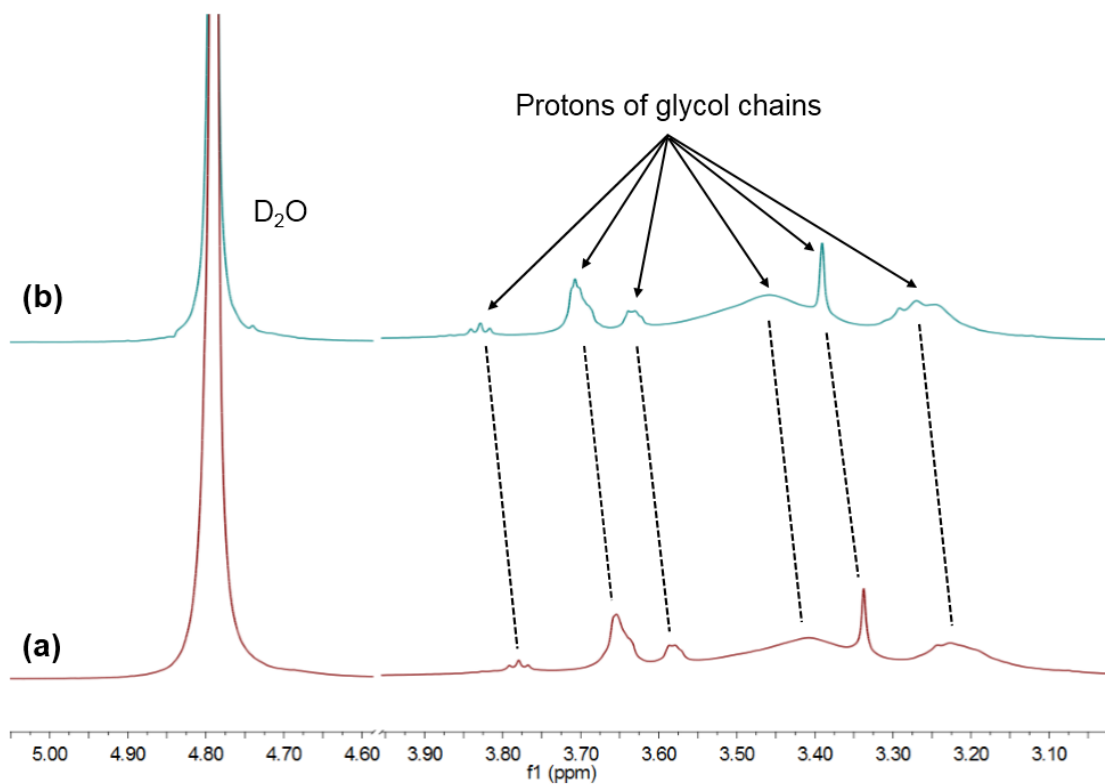

**Figure S9.**  $^1\text{H}$  NMR spectrum ( $\text{D}_2\text{O}$ , 293 K, 500 MHz) of **H**: (a) in the absence of  $\text{K}^+$ ; (b) in the presence of equimolar  $\text{K}^+$ .  $[\text{H}] = 5.00$  mM.
